# Supplementary material
Source: HighWire-hosted journal article supplement (http://gut.bmjjournals.com/highwire/filestream/192723/field_highwire_adjunct_files/0/gut.2007.145839supp_figures.pdf)
Supplement: gut.2007.145839supp_figures.pdf [file gut.2007.145839supp_figures.pdf]

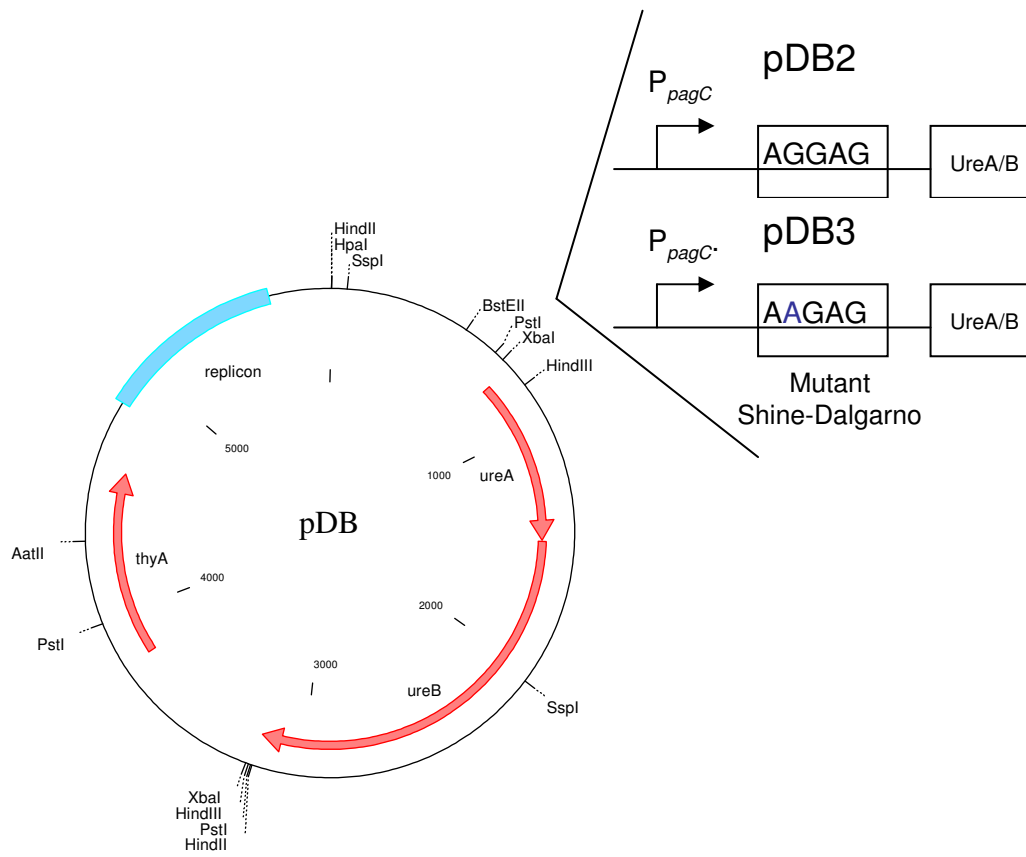

**Aebischer et al.**

**Supplementary Figure 1:** Schematic map of expression plasmids used to construct recombinant Ty21a vaccines.

# Design 1<sup>st</sup> Study

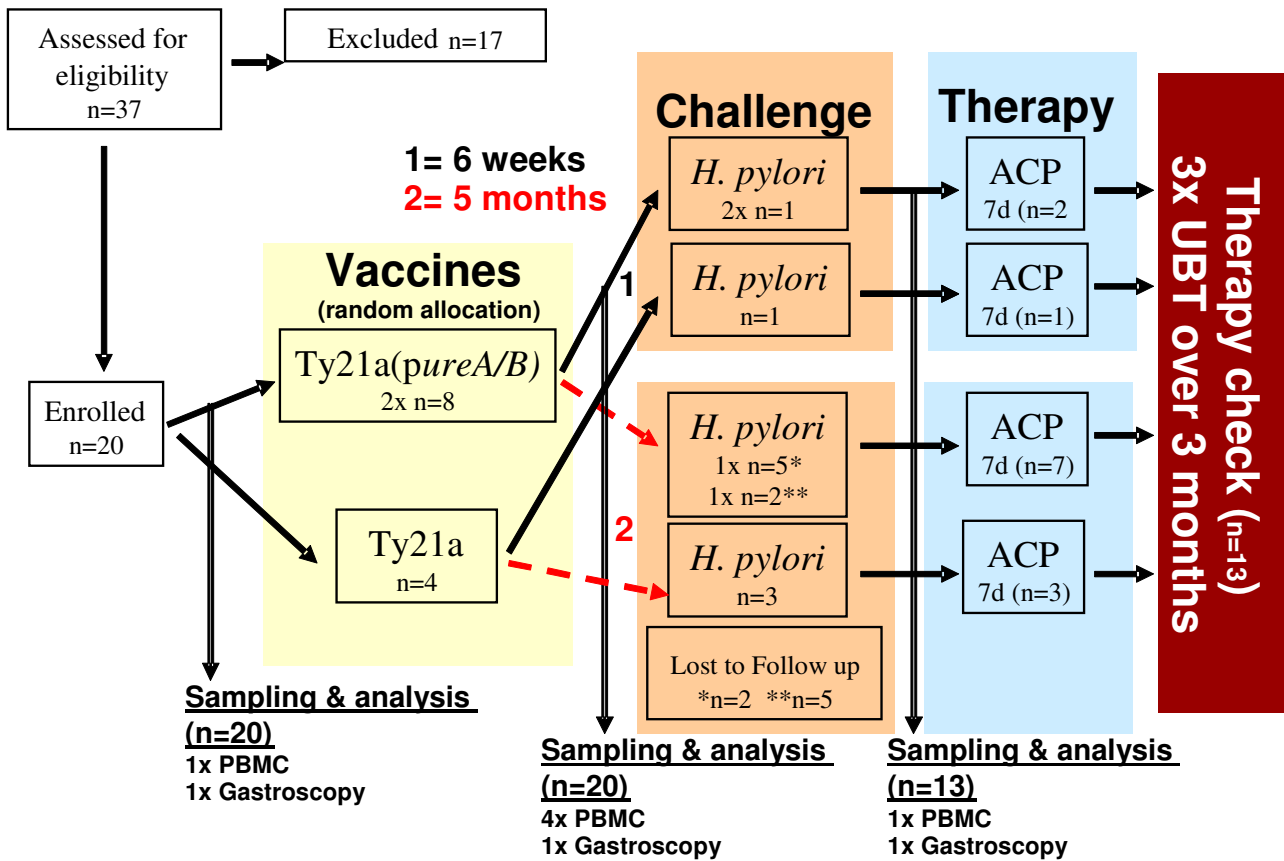

Aebischer et al.

Supplementary Figure 2: Flow chart of the design of the 1<sup>st</sup> study

# Design 2<sup>nd</sup> study

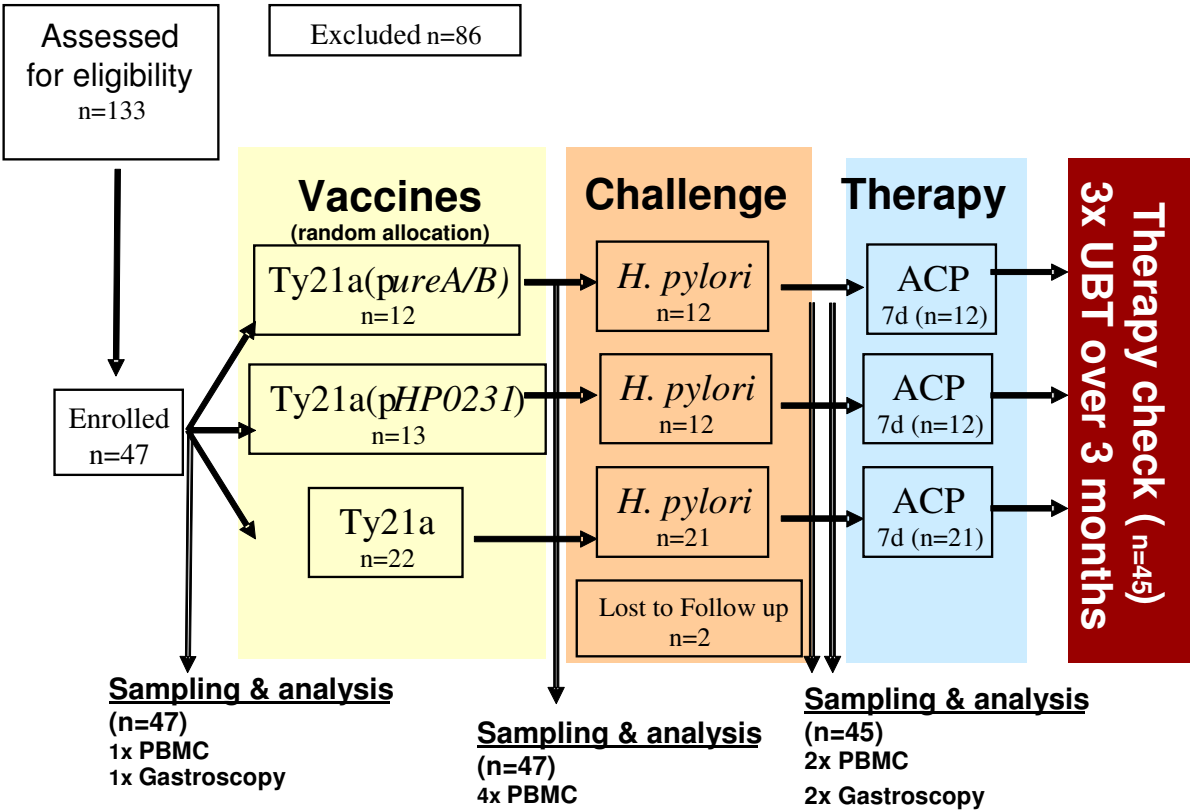

Aebischer et al.  
 Supplementary Figure 3: Flow chart of the design of the 2<sup>nd</sup> study

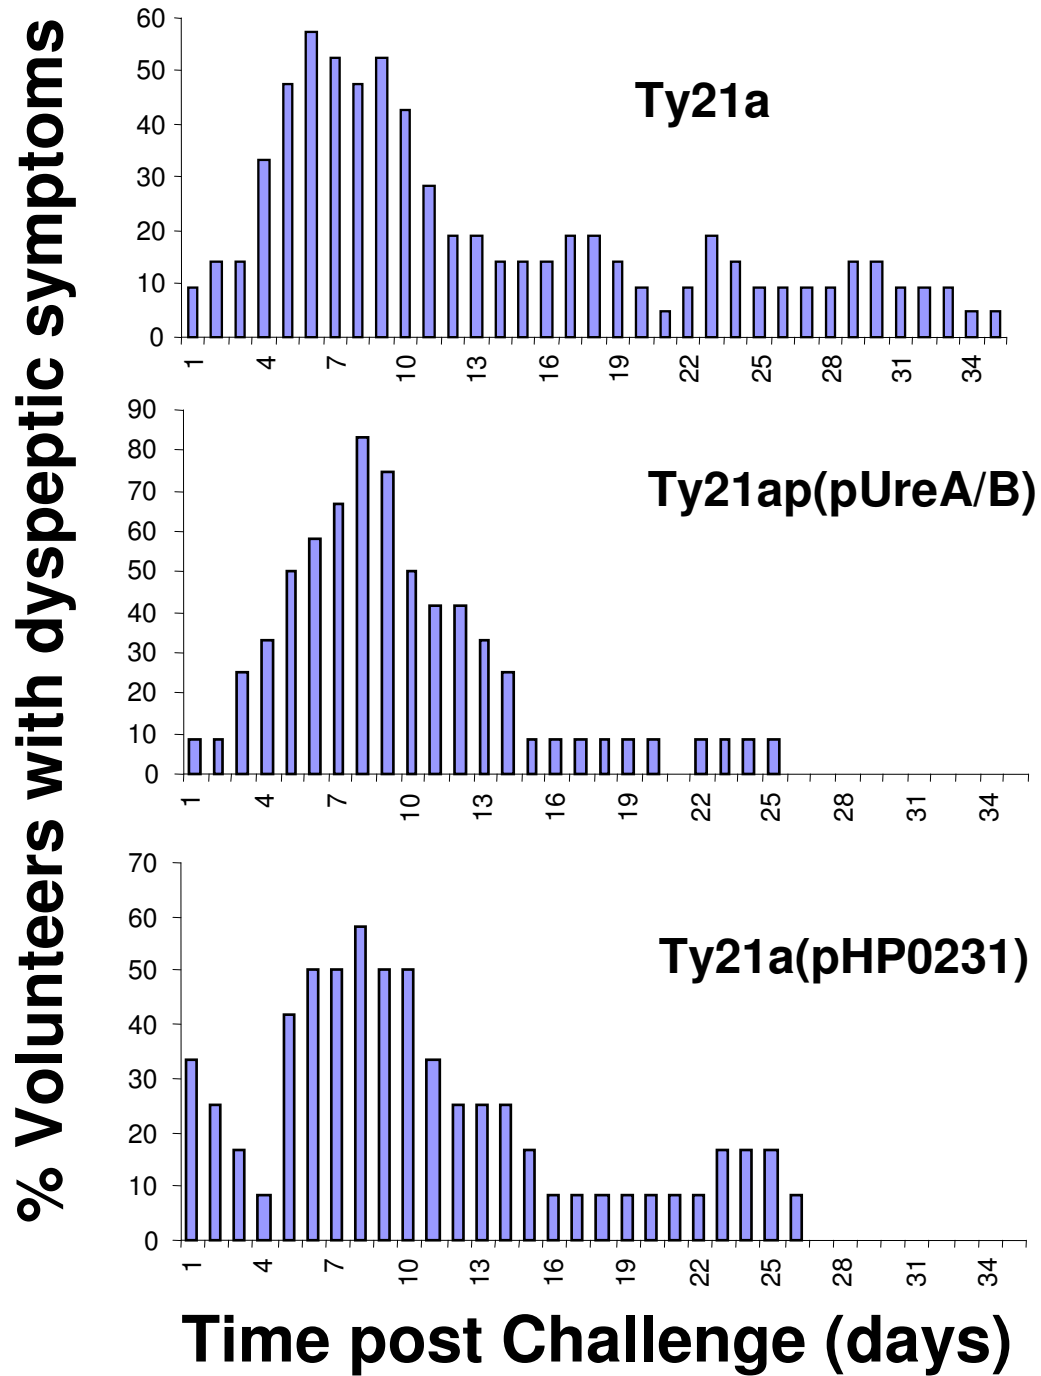

**Aebischer et al.**

**Supplementary Figure 4:** Adverse effects recorded over time in 2<sup>nd</sup> Study. One volunteer in each vaccine group (#5,18,46) developed transient Grade 3 adverse effects (nausea, vomiting, strong abdominal pain and diarrhoea). One volunteer developed a small gastric ulcer that was successfully treated with antacids.

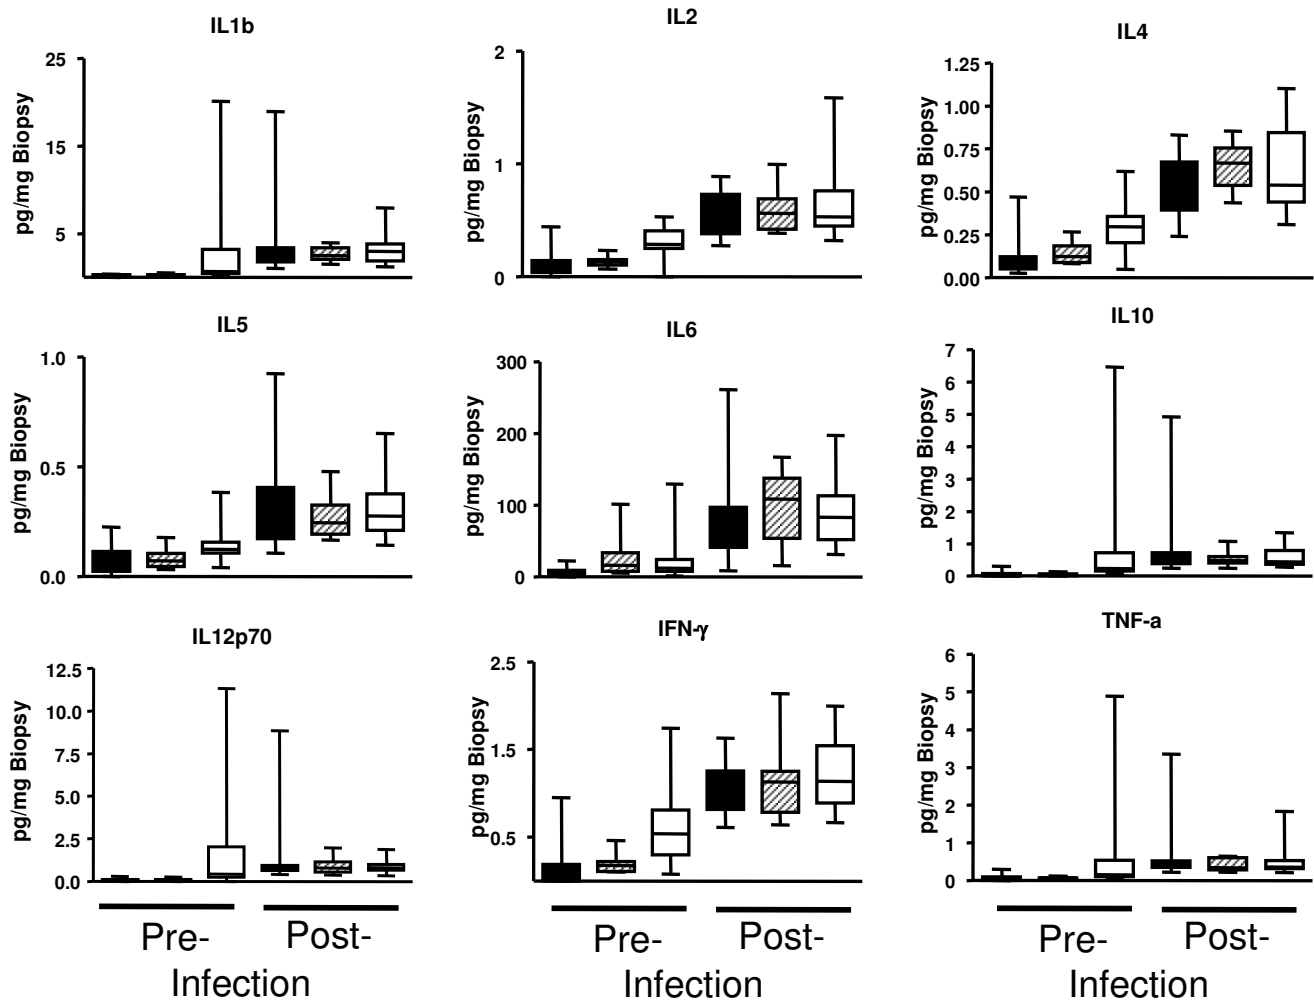

Vaccine groups

- Ty21a(pUreA/B)
- ▨ Ty21a(pHP0231)
- Ty21a

**Aebischer et al.**

**Supplementary Figure 5:** Infection induces increase in local cytokine secretion. Antrum biopsies were taken at enrolment, i.e. pre-infection, and 6 weeks after infection and cultured for 24 h as described. Cytokine levels in culture supernatants were determined by CBA assay and are expressed as pg per mg of biopsy tissue cultured.

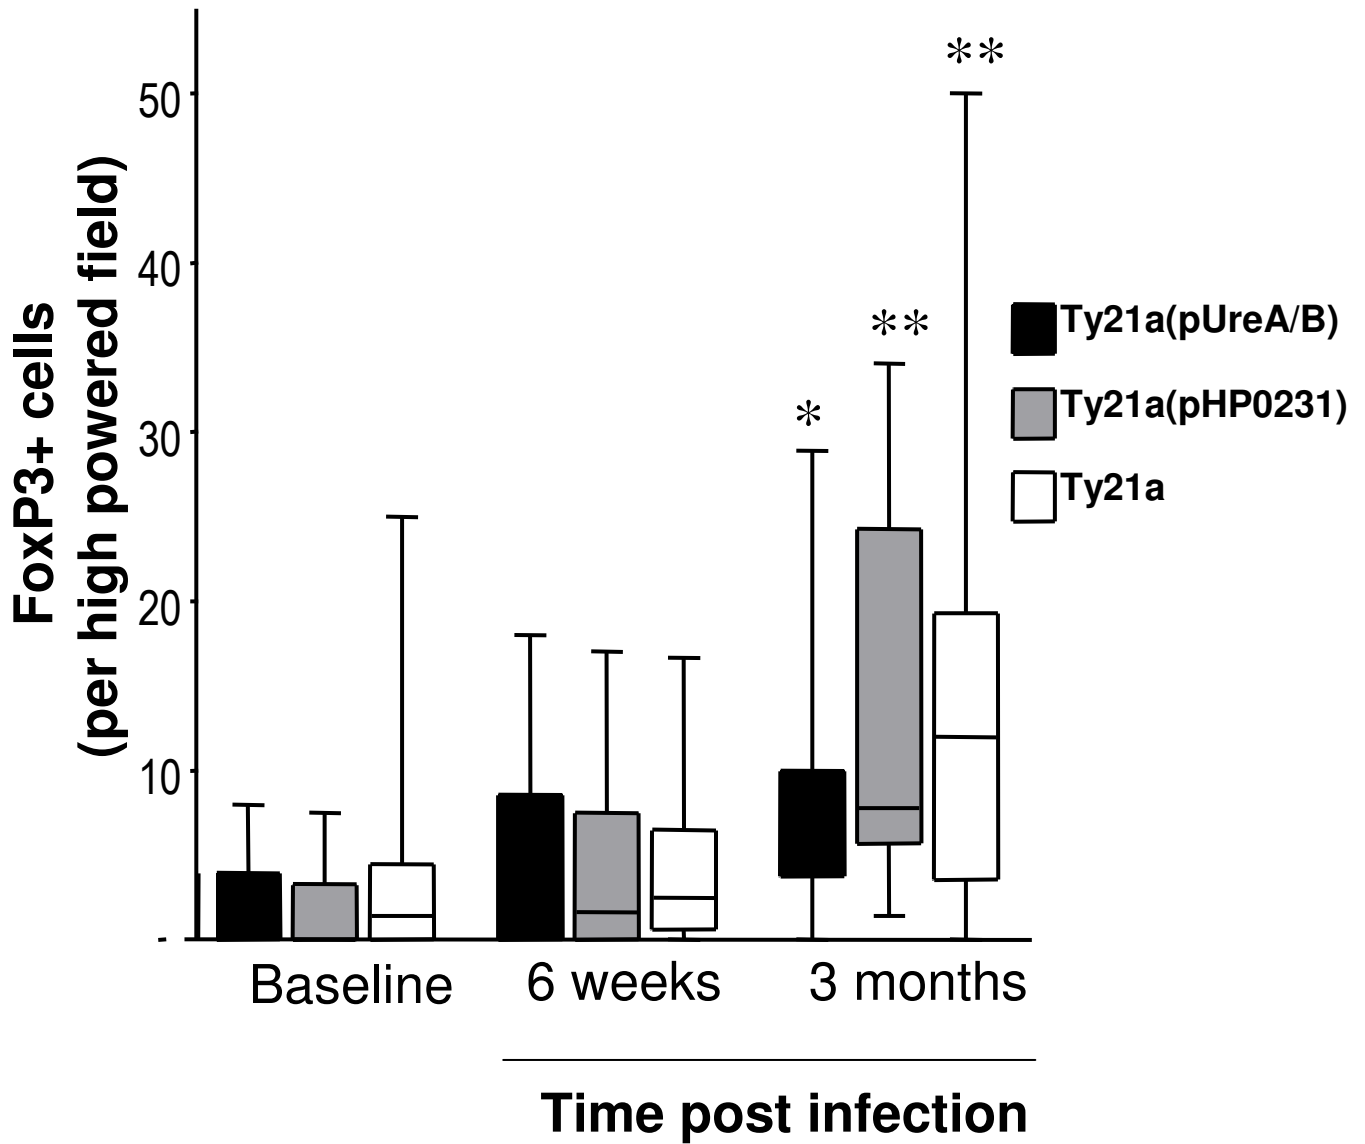

**Aebischer et al.**

**Supplementary Figure 6:** Increase in FoxP3<sup>+</sup> cells in stomach mucosa after *H. pylori* challenge. FoxP3 was detected by immunohistochemistry as described (Epple HJ et al.,(2006) *Blood*, 108:3072). Box and whisker plots with range, 25 and 75%iles and median are shown grouping volunteers from individual treatment arms. FoxP3<sup>+</sup> cells were significantly increased compared to baseline only 3 months after infection (\*, \*\* P<0.05 and P<0.01 respectively by Mann-Whitney U test). FoxP3<sup>+</sup> cells in the duodenum were not significantly affected by *H. pylori* infection (not shown).
